# Supplementary material
Source: MDPI journal article supplement (https://www.mdpi.com/search?q=materials-12-03945)
Supplement: s001 [file materials-12-03945-s001.pdf]

# Substitutions of $Zr^{4+}/V^{5+}$ for $Y^{3+}/Mo^{6+}$ in $Y_2Mo_3O_{12}$ for Less Hygroscopicity and Low Thermal Expansion Properties

Qiang Ma <sup>1</sup>, Lulu Chen <sup>1</sup>, Heng Qi <sup>1</sup>, Qi Xu <sup>1</sup>, Baohe Yuan <sup>1</sup>, Xiansheng Liu <sup>2,\*</sup> and Lei Xu <sup>1,\*</sup>

<sup>1</sup> Collage of Electric Power, North China University of Water Resources and Electric Power, Zhengzhou 450011, China; mqiang1977@ncwu.edu.cn (Q.M.); chenlulu@ncwu.edu.cn (L.C.) hqi1292@163.com (H.Q.); hnxuq@ncwu.edu.cn (Q.X.); yuanbaohe@ncwu.edu.cn (B.Y.)

<sup>2</sup> Henan Key Laboratory of Photovoltaic Materials and Low Dimensional Materials Science Laboratory, Henan University, Kaifeng 475004, China

\* Correspondence: liuxiansheng69@126.com (X.L.); xulei@ncwu.edu.cn (L.X.); Tel.: +86-15903782302 (X.L.); +86-13838127525 (L.X.)

Received: 11 October 2019; Accepted: 24 November 2019; Published: date

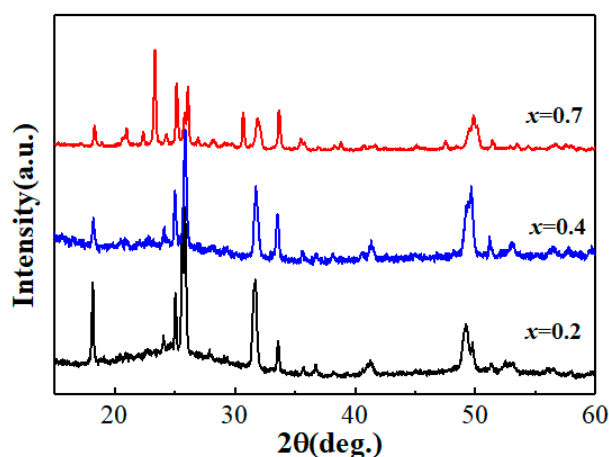

**Figure 1.** XRD patterns of  $Y_{2-x}Zr_xMo_{3-x}V_xO_{12}$ , for  $x = 0.2, 0.4$  and  $0.7$ .

The results of other stoichiometric ratios are similar to those mentioned in the submission, for comparison, we only provide some results. For example, the result of XRD for  $x = 0.2$  and  $0.4$  is similar to  $x = 0.2$  and  $x = 0.7$  is similar to  $x = 0.5$
